# Supplementary material
Source: PubMed Central journal article supplement (PMC5330429)
Supplement: NIHMS70438-supplement-Supplementary_Tables.pdf [file NIHMS70438-supplement-Supplementary_Tables.pdf]

**Supplementary Table 1.** Baseline characteristics of CAMERA participants

| Characteristic                  | Metformin (n=86) | Placebo (n=87)   |
|---------------------------------|------------------|------------------|
| Males                           | 70 (81%)         | 63 (72%)         |
| Age (years)                     | 63 (8)           | 64 (8)           |
| Weight (kg)                     | 87.9 (14.1)      | 86.8 (15.0)      |
| BMI (kg/m <sup>2</sup> )        | 30.2 (4.0)       | 30.5 (4.4)       |
| Fasting plasma glucose (mmol/L) | 5.4 (0.6)        | 5.3 (0.5)        |
| HOMA2-IR*†                      | 1.36 (1.23-1.51) | 1.40 (1.25-1.56) |
| HbA1c (mmol/mol)                | 38.7 (3.6)       | 38.2 (3.3)       |
| HbA1c (%)                       | 5.6 (0.3)        | 5.6 (0.3)        |
| Fasting leptin (ng/mL)*         | 16.1 (13.6-19.1) | 18.7 (15.8-22.1) |
| Fasting total GLP-1 (pg/mL)*    | 11.6 (10.1-13.3) | 12.4 (10.9-14.2) |

Data presented as mean (SD) or n (%) except where indicated (\*Geometric mean and 95%CI)  
† calculated using the HOMA2-IR calculator (<https://www.dtu.ox.ac.uk/homacalculator/>)

Supplementary Table 2. Review of previous studies investigating the effect of metformin on circulating GLP-1

| REFERENCE                   | Study summary                                                                                                                         | N, duration       | Methods                                                                                                                                                                                                                             | Metformin effect on GLP-1                                                                                                                                                                                                                     |
|-----------------------------|---------------------------------------------------------------------------------------------------------------------------------------|-------------------|-------------------------------------------------------------------------------------------------------------------------------------------------------------------------------------------------------------------------------------|-----------------------------------------------------------------------------------------------------------------------------------------------------------------------------------------------------------------------------------------------|
| Kappe et al. (2014)         | To determine if high fat diet (HFD) and metformin lowers number of entero-endocrine L cells and/or GLP-1 plasma levels                | -, -              | C57/B16 mice received control/HFD for 12 weeks and oral metformin/ saline for last 14 days. ELISA used to measure GLP-1 before and after metformin. Immunohistochemistry used to quantify GLP-1 positive cells in intestinal cells. | <ul style="list-style-type: none"> <li>- ↓ GLP positive cells in HFD mice</li> <li>- improved incretin response</li> <li>- intestinal expression of GLP-1R mRNA upregulation</li> <li>- improved metformin response in mice on HFD</li> </ul> |
| Wu et al. (2014)            | Study of Caucasian T2DM men treated with placebo or metformin to investigate effects on DPP-4 and total intact GLP-1                  | N=12, 2 X 7 days  | Crossover study with Intra-duodenal glucose infusion on day 5 and 8 then C-terminally directed assay and sandwich ELISA                                                                                                             | <ul style="list-style-type: none"> <li>- ↓ plasma fasting DPP-4 activity</li> <li>- ↑ plasma intact GLP-1</li> <li>- no significant difference in total GLP-1</li> </ul>                                                                      |
| Solis-Herrera et al. (2013) | Study assessing glucose lowering mechanisms of sitagliptin and/or metformin in patients with T2DM                                     | N=16, 4 X 6 weeks | Cross-over study with meal tolerance testing, radioimmunoassay, glucose oxidase method and ELISA                                                                                                                                    | <ul style="list-style-type: none"> <li>- ↑ GLP-1 secretion and β cell function in metformin and sitagliptin combined (2 to 3 fold ↑ in basal plasma GLP-1 concentration)</li> <li>- no significant ↑ with metformin alone</li> </ul>          |
| Vardarli et al. (2013)      | Effect of metformin, sitagliptin or both on GLP-1 responses of overweight/obese patients with T2DM                                    | N=20, 4 X 6 days  | Cross-over study with oral glucose challenge on day 5 and IV glucose infusion on day 6 then sandwich ELISA or C-terminally detected assay                                                                                           | <ul style="list-style-type: none"> <li>- metformin ↑ fasting total GLP-1 by ↑ insulin secretory responses.</li> <li>- Whereas, DPP-4 inhibitor ↑ plasma intact GLP-1 and ↓ total GLP-1</li> </ul>                                             |
| Kappe et al. (2012)         | Effect of metformin on regulation of GLP-1 secreting cells                                                                            | -, -              | Used murine GLUTag cell line, DNA-fragment assay, ELISA, RT-PCR etc.                                                                                                                                                                | <ul style="list-style-type: none"> <li>- Regulates GLP-1 receptor expression in pancreas</li> <li>- Protects GLP-1 cells against lipopoptosis</li> <li>- ↑ secretion of pre-proglucagon</li> </ul>                                            |
| Thondam et al. (2012)       | Effect of 3 months of metformin monotherapy on GLP-1, ghrelin and DPP-4 in obese T2DM patients                                        | N=8, 3 months     | Prospective, observational study using ELISA                                                                                                                                                                                        | <ul style="list-style-type: none"> <li>- ↑ postprandial active GLP-1 levels</li> <li>- after 3 months, mean fasting GLP-1 didn't significantly change</li> </ul>                                                                              |
| Mulherin et al. (2011)      | Assess direct effects of metformin on GLP-1 secretion from intestinal L cells and assess indirect actions that increase plasma GLP-1. | -, -              | In vivo and in vitro studies using murine human NCI-H716 and rat FRIC cells                                                                                                                                                         | <ul style="list-style-type: none"> <li>- ↑ GLP-1 in vivo only (M3 muscarinic dependent effects)</li> <li>- activity of DPP-4 not affected</li> <li>- ↑ total GLP-1 over 24 hours</li> </ul>                                                   |
| Cuthbertson et al. (2011)   | Acute effect of metformin and GLP-1 alone or in combination on DPP-4 activity in overweight/obese patients with T2DM                  | N=10, 1 day       | Overnight fast then blood tested for DPP-4 activity, insulin, GLP-1, glucose and C-peptide concentrations using biochemical assays                                                                                                  | <ul style="list-style-type: none"> <li>- DPP-4 only inhibited by 7%</li> <li>- insulin sensitizing effects important in glucose lowering by GLP-1</li> </ul>                                                                                  |

|                               |                                                                                                                                                                                  |                                            |                                                                                                                                                                                              |                                                                                                                                                                                                                                                                              |
|-------------------------------|----------------------------------------------------------------------------------------------------------------------------------------------------------------------------------|--------------------------------------------|----------------------------------------------------------------------------------------------------------------------------------------------------------------------------------------------|------------------------------------------------------------------------------------------------------------------------------------------------------------------------------------------------------------------------------------------------------------------------------|
| <b>Maida et al. (2011)</b>    | To assess if metformin exerts glucoregulatory actions via modulation of the incretin axis using knock-out GLP-1R versus obese hyperglycaemic wild-type mice with/without exendin | -, -                                       | Assessed incretin receptor expression, glucose tolerance, gastric emptying and food intake                                                                                                   | <ul style="list-style-type: none"> <li>- ↑ GLP-1 levels and improved glucose tolerance in knock-out mice.</li> <li>- ↑ GLP-1R in INS-1β CELLS via PPAR-α dependent and AMPK independent pathways</li> </ul>                                                                  |
| <b>Migoya et al. (2010)</b>   | Effect of metformin in healthy men and women                                                                                                                                     | N=16,<br>4 X 2 days                        | Four period (two day) cross-over study including placebo and metformin interventions; Day 2 active and total GLP-1 and GIP and glucose plasma concentrations measured pre-meal and post-meal | <ul style="list-style-type: none"> <li>- ↑ postprandial total GLP-1 concentrations in plasma</li> <li>- ↑ postprandial active GLP-1 concentrations</li> <li>- no effect on total or active GIP concentrations</li> <li>- no effect on postprandial DPP-4 activity</li> </ul> |
| <b>Svensden et al. (2009)</b> | Effect of metformin in women with polycystic ovarian syndrome                                                                                                                    | N=40 (22 completed treatment),<br>8 months | Uncontrolled interventional study with 180min oral glucose loading tests and comparison to baseline                                                                                          | <ul style="list-style-type: none"> <li>- ↑ area under GLP-1 curve</li> </ul>                                                                                                                                                                                                 |
| <b>Green et al. (2006)</b>    | Effect of metformin on DPP-4 activity in normal and obese diabetic mice                                                                                                          | -, -                                       | Radioimmunoassay using blood samples taken 30 minutes post-intraperitoneal injection of glucose and GLP-1 or GLP-1+ metformin                                                                | <ul style="list-style-type: none"> <li>- in vivo metformin ↓ DPP-4 activity in ob/ob mice with improved glucose lowering and insulin release from GLP-1</li> <li>- ↑ circulating GLP-1 (7-36) amide levels</li> </ul>                                                        |
| <b>Mannucci et al. (2004)</b> | Effect of metformin on 22 obese T2DM versus 12 placebo controls                                                                                                                  | N=34,<br>4 weeks                           | GLP-1 measured before and after 100g glucose load after 4 weeks of 850mg metformin                                                                                                           | <ul style="list-style-type: none"> <li>- Single dose didn't modify GLP-1</li> <li>- fasting GLP-1 ↑ after 4 weeks of metformin</li> </ul>                                                                                                                                    |
| <b>Hinke et al. (2002)</b>    | Investigates whether metformin acts as a DPP-4 inhibitor to increase GLP-1 in obese non-diabetic patients                                                                        | -, -                                       | In vitro analysis of 20% human serum, porcine kidney and recombinant human DPP-4 using mass spectrometry and surface plasmon resonance                                                       | <ul style="list-style-type: none"> <li>- Metformin does not act directly on DPP-4</li> <li>- Instead, it may ↑ GLP-1 and glucagon secretion from pancreatic α cells and intestinal L cells</li> </ul>                                                                        |
| <b>Mannucci et al. (2001)</b> | Effect of metformin versus placebo on GLP-1 and leptin in obese non-diabetic men before and after 14 days of treatment                                                           | N=10,<br>14 days                           | GLP-1 measured using ELISA in fasting state and after oral glycaemic load during euglycaemic hyperinsulinaemic clamp                                                                         | <ul style="list-style-type: none"> <li>- significant GLP-1 ↑ at 30 and 60 minutes after oral glucose load</li> <li>-no GLP-1 variation in controls</li> </ul>                                                                                                                |

1  
2  
3  
4  
5  
6  
7  
8  
9  
10  
11  
12  
13  
14  
15  
16  
17  
18  
19  
20  
21  
22  
23  
24  
25  
26  
27  
28  
29  
30  
31  
32  
33  
34  
35  
36  
37  
38  
39  
40  
41  
42  
43  
44  
45  
46  
47  
48  
49

**References for Supplementary Table 2**

1. Kappe C, Zhang Q, Nystrom T, Sjöholm A. Effects of high-fat diet and the anti-diabetic drug metformin on circulating GLP-1 and the relative number of intestinal L-cells. *Diabetol Metab Syndr* 2014; **6**: 70.
2. Wu T, Thazhath SS, Bound MJ, Jones KL, Horowitz M, Rayner CK. Mechanism of increase in plasma intact GLP-1 by metformin in type 2 diabetes: stimulation of GLP-1 secretion or reduction in plasma DPP-4 activity? *Diabetes Res Clin Pract* 2014; **106**(1): e3-6.
3. Solis-Herrera C, Triplitt C, Garduno-Garcia Jde J, Adams J, DeFronzo RA, Cersosimo E. Mechanisms of glucose lowering of dipeptidyl peptidase-4 inhibitor sitagliptin when used alone or with metformin in type 2 diabetes: a double-tracer study. *Diabetes Care* 2013; **36**(9): 2756-62.
4. Vardarli I, Arndt E, Deacon CF, Holst JJ, Nauck MA. Effects of sitagliptin and metformin treatment on incretin hormone and insulin secretory responses to oral and "isoglycemic" intravenous glucose. *Diabetes* 2014; **63**(2): 663-74.
5. Kappe C, Holst JJ, Zhang Q, Sjöholm A. Molecular mechanisms of lipoapoptosis and metformin protection in GLP-1 secreting cells. *Biochem Biophys Res Commun* 2012; **427**(1): 91-5.
6. Thondam SK, Cross A, Cuthbertson DJ, Wilding JP, Daousi C. Effects of chronic treatment with metformin on dipeptidyl peptidase-4 activity, glucagon-like peptide 1 and ghrelin in obese patients with Type 2 diabetes mellitus. *Diabet Med* 2012; **29**(8): e205-10.
7. Mulherin AJ, Oh AH, Kim H, Grieco A, Lauffer LM, Brubaker PL. Mechanisms underlying metformin-induced secretion of glucagon-like peptide-1 from the intestinal L cell. *Endocrinology* 2011; **152**(12): 4610-9.
8. Cuthbertson J, Patterson S, O'Harte FP, Bell PM. Addition of metformin to exogenous glucagon-like peptide-1 results in increased serum glucagon-like peptide-1 concentrations and greater glucose lowering in type 2 diabetes mellitus. *Metabolism* 2011; **60**(1): 52-6.
9. Maida A, Lamont BJ, Cao X, Drucker DJ. Metformin regulates the incretin receptor axis via a pathway dependent on peroxisome proliferator-activated receptor-alpha in mice. *Diabetologia* 2011; **54**(2): 339-49.
10. Migoya EM, Bergeron R, Miller JL, et al. Dipeptidyl peptidase-4 inhibitors administered in combination with metformin result in an additive increase in the plasma concentration of active GLP-1. *Clin Pharmacol Ther.* 2010; **88**(6): 801-8.
11. Svendsen PF, Nilas L, Madsbad S, Holst JJ. Incretin hormone secretion in women with polycystic ovary syndrome: roles of obesity, insulin sensitivity, and treatment with metformin. *Metabolism* 2009; **58**(5): 586-93.
12. Green BD, Irwin N, Duffy NA, Gault VA, O'Harte F P, Flatt PR. Inhibition of dipeptidyl peptidase-IV activity by metformin enhances the antidiabetic effects of glucagon-like peptide-1. *Eur J Pharmacol* 2006; **547**(1-3): 192-9.
13. Mannucci E, Tesi F, Bardini G, et al. Effects of metformin on glucagon-like peptide-1 levels in obese patients with and without Type 2 diabetes. *Diabetes Nutr Metab* 2004; **17**(6): 336-42.
14. Hinke SA, Kuhn-Wache K, Hoffmann T, Pederson RA, McIntosh CH, Demuth HU. Metformin effects on dipeptidylpeptidase IV degradation of glucagon-like peptide-1. *Biochem Biophys Res Commun* 2002; **291**(5): 1302-8.
15. Mannucci E, Ognibene A, Cremasco F, et al. Effect of metformin on glucagon-like peptide 1 (GLP-1) and leptin levels in obese nondiabetic subjects. *Diabetes Care* 2001; **24**(3): 489-94.

Supplementary Table 3. DIRECT collaborators

| First Name  | Surname        | Initials | Institution Address                                                                                                                                                                                                                                                                                                                                                                                                             |
|-------------|----------------|----------|---------------------------------------------------------------------------------------------------------------------------------------------------------------------------------------------------------------------------------------------------------------------------------------------------------------------------------------------------------------------------------------------------------------------------------|
| Christopher | Jennison       | C.       | Department of Mathematical Sciences, University of Bath, Bath, UK                                                                                                                                                                                                                                                                                                                                                               |
| Patrick     | Baum           | P.       | Boehringer Ingelheim Pharma GmbH & Co. KG, Translational Medicine & Clinical Pharmacology, Birkendorferstr.65, 88397 Biberach an der Riss, Germany                                                                                                                                                                                                                                                                              |
| Corinna     | Schoelsch      | C.       | Boehringer Ingelheim Pharma GmbH & Co. KG, Translational Medicine & Clinical Pharmacology, Birkendorferstr.65, 88397 Biberach an der Riss, Germany                                                                                                                                                                                                                                                                              |
| Jan         | Freijer        | J.I.     | Boehringer Ingelheim Pharma GmbH & Co. KG, Translational Medicine & Clinical Pharmacology, Birkendorferstr.65, 88397 Biberach an der Riss, Germany                                                                                                                                                                                                                                                                              |
| Rolf        | Grempler       | R.       | Boehringer Ingelheim Pharma GmbH & Co. KG, Translational Medicine & Clinical Pharmacology, Birkendorferstr.65, 88397 Biberach an der Riss, Germany                                                                                                                                                                                                                                                                              |
| Ulrike      | Graefe-Mody    | U.       | Boehringer Ingelheim Pharma GmbH & Co. KG, Medicine Therapeutic Area Metabolism 1, Binger Strasse 173, 55216 Ingelheim am Rhein, Germany                                                                                                                                                                                                                                                                                        |
| Anita       | Hennige        | A.M.     | Boehringer Ingelheim Pharma GmbH & Co. KG, Medicine Therapeutic Area Metabolism 1, Birkendorferstr.65, 88397 Biberach an der Riss, Germany                                                                                                                                                                                                                                                                                      |
| Christiane  | Dings          | C.       | Clinical Pharmacy, Saarland University, Campus C2.2, 66123 Saarbrücken, Germany                                                                                                                                                                                                                                                                                                                                                 |
| Thorsten    | Lehr           | T.       | Clinical Pharmacy, Saarland University, Campus C2.2, 66123 Saarbrücken, Germany                                                                                                                                                                                                                                                                                                                                                 |
| Nina        | Scherer        | N.       | Clinical Pharmacy, Saarland University, Campus C2.2, 66123 Saarbrücken, Germany                                                                                                                                                                                                                                                                                                                                                 |
| Francois    | Pattou         | F.       | Centre Hospitalier Régional Universitaire de Lille 2, Av Oscar Lambret 59037 Lille Cedex                                                                                                                                                                                                                                                                                                                                        |
| Violeta     | Raverdi        | V.       | Centre Hospitalier Régional Universitaire de Lille 2, Av Oscar Lambret 59037 Lille Cedex                                                                                                                                                                                                                                                                                                                                        |
| Robert      | Caiazzo        | R.       | Centre Hospitalier Régional Universitaire de Lille 2, Av Oscar Lambret 59037 Lille Cedex                                                                                                                                                                                                                                                                                                                                        |
| Fanelly     | Torres         | F.       | Centre Hospitalier Régional Universitaire de Lille 2, Av Oscar Lambret 59037 Lille Cedex                                                                                                                                                                                                                                                                                                                                        |
| Helene      | Verkindt       | H.       | Centre Hospitalier Régional Universitaire de Lille 2, Av Oscar Lambret 59037 Lille Cedex                                                                                                                                                                                                                                                                                                                                        |
| Andrea      | Mari           | A.       | Institute of Neuroscience, National Research Council, Corso Stati Uniti 4, 35127 Padova, Italy                                                                                                                                                                                                                                                                                                                                  |
| Andrea      | Tura           | A.       | Institute of Neuroscience, National Research Council, Corso Stati Uniti 4, 35127 Padova, Italy                                                                                                                                                                                                                                                                                                                                  |
| Toni        | Giorgino       | T.       | Institute of Neuroscience, National Research Council, Corso Stati Uniti 4, 35127 Padova, Italy                                                                                                                                                                                                                                                                                                                                  |
| Loic        | Yengo          | L.       | Centre National de la Recherche Scientifique CNRS, Délégation Nord Pas-de-Calais et Picardie du CNRS Espace Recherche et Innovation, 2, rue des Canoniers, 59046 LILLE CEDEX, France                                                                                                                                                                                                                                            |
| Philippe    | Froguel        | P.       | Centre National de la Recherche Scientifique CNRS, Délégation Nord Pas-de-Calais et Picardie du CNRS Espace Recherche et Innovation, 2, rue des Canoniers, 59046 LILLE CEDEX, France<br>IMPERIAL COLLEGE LONDON, Department of Genomics of Common Disease, School Of Public Health, Hammersmith Hospital Campus, Imperial College Faculty of Medicine, Burlington-Danes building, Du Cane Road, London, W12 0NN, United Kingdom |
| Amelie      | Bonneford      | A.       | Centre National de la Recherche Scientifique CNRS, Délégation Nord Pas-de-Calais et Picardie du CNRS Espace Recherche et Innovation, 2, rue des Canoniers, 59046 LILLE CEDEX, France                                                                                                                                                                                                                                            |
| Mickael     | Canouil        | M.       | Centre National de la Recherche Scientifique CNRS, Délégation Nord Pas-de-Calais et Picardie du CNRS Espace Recherche et Innovation, 2, rue des Canoniers, 59046 LILLE CEDEX, France                                                                                                                                                                                                                                            |
| Veronique   | Dhennin        | V.       | Centre National de la Recherche Scientifique CNRS, Délégation Nord Pas-de-Calais et Picardie du CNRS Espace Recherche et Innovation, 2, rue des Canoniers, 59046 LILLE CEDEX, France                                                                                                                                                                                                                                            |
| Caroline    | Brorsson       | C.       | Center for Biological Sequence Analysis, Dept. of Systems Biology, Technical University of Denmark, Kongens Lyngby, Denmark                                                                                                                                                                                                                                                                                                     |
| Soren       | Brunak         | S.       | Center for Biological Sequence Analysis, Dept. of Systems Biology, Technical University of Denmark, Kongens Lyngby, Denmark                                                                                                                                                                                                                                                                                                     |
| Peter       | Davidson       | P.       | Center for Biological Sequence Analysis, Dept. of Systems Biology, Technical University of Denmark, Kongens Lyngby, Denmark                                                                                                                                                                                                                                                                                                     |
| Federico    | De Masi        | F.       | Center for Biological Sequence Analysis, Dept. of Systems Biology, Technical University of Denmark, Kongens Lyngby, Denmark                                                                                                                                                                                                                                                                                                     |
| Valborg     | Gudmundsdóttir | V.       | Center for Biological Sequence Analysis, Dept. of Systems Biology, Technical University of Denmark, Kongens Lyngby, Denmark                                                                                                                                                                                                                                                                                                     |
| Ramneek     | Gupta          | R.       | Center for Biological Sequence Analysis, Dept. of Systems Biology, Technical University of Denmark, Kongens Lyngby, Denmark                                                                                                                                                                                                                                                                                                     |
| Helle       | Krogh Pedersen | H.       | Center for Biological Sequence Analysis, Dept. of Systems Biology, Technical University of Denmark, Kongens Lyngby, Denmark                                                                                                                                                                                                                                                                                                     |
| Kristoffer  | Rapacki        | K.       | Center for Biological Sequence Analysis, Dept. of Systems Biology, Technical University of Denmark, Kongens Lyngby, Denmark                                                                                                                                                                                                                                                                                                     |
| Emil        | Rydza          | E.       | Center for Biological Sequence Analysis, Dept. of Systems Biology, Technical University of Denmark, Kongens Lyngby, Denmark                                                                                                                                                                                                                                                                                                     |
| Hans-Henrik | Staerfeldt     | H.       | Center for Biological Sequence Analysis, Dept. of Systems Biology, Technical University of Denmark, Kongens Lyngby, Denmark                                                                                                                                                                                                                                                                                                     |
| Karina      | Banasik        | K.       | Center for Biological Sequence Analysis, Dept. of Systems Biology, Technical University of Denmark, Kongens Lyngby, Denmark                                                                                                                                                                                                                                                                                                     |

|           |                   |      |                                                                                                                                                                                                                                                                                                                                                                                                                                                                                                                                                                               |
|-----------|-------------------|------|-------------------------------------------------------------------------------------------------------------------------------------------------------------------------------------------------------------------------------------------------------------------------------------------------------------------------------------------------------------------------------------------------------------------------------------------------------------------------------------------------------------------------------------------------------------------------------|
| Cecilia   | Engel Thomas      | C.E. | Center for Biological Sequence Analysis, Dept. of Systems Biology, Technical University of Denmark, Kongens Lyngby, Denmark                                                                                                                                                                                                                                                                                                                                                                                                                                                   |
| Peter     | Sackett           | P.W. | Center for Biological Sequence Analysis, Dept. of Systems Biology, Technical University of Denmark, Kongens Lyngby, Denmark                                                                                                                                                                                                                                                                                                                                                                                                                                                   |
| Piotr     | Chmura            | P.J. | Center for Biological Sequence Analysis, Dept. of Systems Biology, Technical University of Denmark, Kongens Lyngby, Denmark                                                                                                                                                                                                                                                                                                                                                                                                                                                   |
| Sanna     | Herrgard          | S.   | Center for Biological Sequence Analysis, Dept. of Systems Biology, Technical University of Denmark, Kongens Lyngby, Denmark                                                                                                                                                                                                                                                                                                                                                                                                                                                   |
| Mia       | Dybkjær Rønsholdt | M.   | Center for Biological Sequence Analysis, Dept. of Systems Biology, Technical University of Denmark, Kongens Lyngby, Denmark                                                                                                                                                                                                                                                                                                                                                                                                                                                   |
| Andreas   | Fritsche          | A.   | Medizinische Universitätsklinik Tübingen, Eberhard Karls Universität Tübingen, Otfried Müller Straße 10, 72076 Tübingen, Germany                                                                                                                                                                                                                                                                                                                                                                                                                                              |
| Annette   | Peters            | A.   | Institute of Epidemiology II, Research Unit of Diabetes Epidemiology, Helmholtz Zentrum München Research Center for Environmental Health, Ingolstaedter Landstr. 1, 85764 Neuherberg, Germany<br>German Center for Diabetes Research (DZD), Neuherberg, Germany; Helmholtz Zentrum München, Ingolstaedter Landstr. 1, 85764 Neuherberg, Germany                                                                                                                                                                                                                               |
| Barbara   | Thorand           | B.   | Institute of Epidemiology II, Research Unit of Diabetes Epidemiology, Helmholtz Zentrum München Research Center for Environmental Health, Ingolstaedter Landstr. 1, 85764 Neuherberg, Germany<br>German Center for Diabetes Research (DZD), Neuherberg, Germany; Helmholtz Zentrum München, Ingolstaedter Landstr. 1, 85764 Neuherberg, Germany                                                                                                                                                                                                                               |
| Jurek     | Adamski           | J.   | Institute of Experimental Genetics, Genome Analysis Center, Ingolstaedter Landstr. 1, 85764 Neuherberg, Germany<br>German Center for Diabetes Research (DZD), 85764 München-Neuherberg, Germany                                                                                                                                                                                                                                                                                                                                                                               |
| Harald    | Grallert          | H.   | Institute of Epidemiology II, Research Unit of Molecular Epidemiology, Helmholtz Zentrum München Research Center for Environmental Health, Neuherberg, Germany<br>German Center for Diabetes Research (DZD), Neuherberg, Germany; Clinical Cooperation Group Type 2 Diabetes, Helmholtz Zentrum München, Neuherberg, Germany;<br>Clinical Cooperation Group Nutrigenomics and Type 2 Diabetes, Helmholtz Zentrum München, German Research Center for Environmental Health, 85764 Neuherberg, Germany<br>Technische Universität München, 85350 Freising-Weihenstephan, Germany |
| Mark      | Haid              | M.   | Institute of Experimental Genetics, Genome Analysis Center, Ingolstaedter Landstr. 1, 85764 Neuherberg, Germany;<br>German Center for Diabetes Research (DZD), 85764 München-Neuherberg, Germany                                                                                                                                                                                                                                                                                                                                                                              |
| Tonia     | Herasgala         | T.   | Institute of Epidemiology II, Research Unit of Diabetes Epidemiology, Helmholtz Zentrum München Research Center for Environmental Health, Ingolstaedter Landstr. 1, 85764 Neuherberg, Germany;                                                                                                                                                                                                                                                                                                                                                                                |
| Jorge     | Ferrer            | J.   | Institut d'Investigacions Biomediques August Pi i Sunye, Centre Esther Koplowitz, c/Rosselló 153, Barcelona 08036, Spain                                                                                                                                                                                                                                                                                                                                                                                                                                                      |
|           |                   |      | Imperial Centre for Translational and Experimental Medicine, Du Cane Road, London W12 0NN, United Kingdom                                                                                                                                                                                                                                                                                                                                                                                                                                                                     |
| Elin      | Birgersson        | E.   | Affinity Proteomics, Science for Life Laboratory, School of Biotechnology, KTH - Royal Institute of Technology, Box 1031, SE-171 21 Solna, Sweden                                                                                                                                                                                                                                                                                                                                                                                                                             |
| Mun-gwan  | Hong              | M.G. | Affinity Proteomics, Science for Life Laboratory, School of Biotechnology, KTH - Royal Institute of Technology, Box 1031, SE-171 21 Solna, Sweden                                                                                                                                                                                                                                                                                                                                                                                                                             |
| Peter     | Nilsson           | P.   | Affinity Proteomics, Science for Life Laboratory, School of Biotechnology, KTH - Royal Institute of Technology, Box 1031, SE-171 21 Solna, Sweden                                                                                                                                                                                                                                                                                                                                                                                                                             |
| Sanna     | Byström           | S.   | Affinity Proteomics, Science for Life Laboratory, School of Biotechnology, KTH - Royal Institute of Technology, Box 1031, SE-171 21 Solna, Sweden                                                                                                                                                                                                                                                                                                                                                                                                                             |
| Jochen    | Schwenk           | J.M. | Affinity Proteomics, Science for Life Laboratory, School of Biotechnology, KTH - Royal Institute of Technology, Box 1031, SE-171 21 Solna, Sweden                                                                                                                                                                                                                                                                                                                                                                                                                             |
| Mathias   | Uhlen             | M.   | Affinity Proteomics, Science for Life Laboratory, School of Biotechnology, KTH - Royal Institute of Technology, Box 1031, SE-171 21 Solna, Sweden                                                                                                                                                                                                                                                                                                                                                                                                                             |
| Melissa   | Thomas            | M.K. | Lilly Research Laboratories, Eli Lilly and Company, Indianapolis, Indiana, 46285, USA                                                                                                                                                                                                                                                                                                                                                                                                                                                                                         |
| Han       | Wu                | H.   | Lilly Research Laboratories, Eli Lilly and Company, Indianapolis, Indiana, 46285, USA                                                                                                                                                                                                                                                                                                                                                                                                                                                                                         |
| Leen      | 't Hart           | L.M. | Leiden University Medical Center, Dept. of Molecular Cell Biology, Albinusdreef 2, 2333ZA Leiden, The Netherlands<br>Leiden University Medical Center, Dept. of Molecular Epidemiology, Albinusdreef 2, 2333ZA Leiden, The Netherlands<br>VU University Medical Center, Dept. of Epidemiology & Biostatistics, De Boelelaan 1089a, 1081 HV Amsterdam, The Netherlands                                                                                                                                                                                                         |
| Nienke    | van Leeuwen       | N.   | Leiden University Medical Center, Dept. of Molecular Cell biology, Albinusdreef 2, 2333ZA Leiden, The Netherlands                                                                                                                                                                                                                                                                                                                                                                                                                                                             |
| Karla     | Allebrandt        | K.   | Diabetes Division, Sanofi-Aventis Deutschland GmbH, Frankfurt, Germany, 65926 Frankfurt am Main                                                                                                                                                                                                                                                                                                                                                                                                                                                                               |
| Francesca | Frau              | F.   | Diabetes Division, Sanofi-Aventis Deutschland GmbH, Frankfurt, Germany, 65926 Frankfurt am Main                                                                                                                                                                                                                                                                                                                                                                                                                                                                               |
| Johann    | Gassenhuber       | J.   | Diabetes Division, Sanofi-Aventis Deutschland GmbH, Frankfurt, Germany, 65926 Frankfurt am Main                                                                                                                                                                                                                                                                                                                                                                                                                                                                               |
| Mathias   | Gebauer           | M.   | DSAR, Sanofi-Aventis Deutschland GmbH, Frankfurt, Germany, 65926 Frankfurt am Main                                                                                                                                                                                                                                                                                                                                                                                                                                                                                            |
| Bernd     | Jablonka          | B.   | Strategy & Innovation, Sanofi-Aventis Deutschland GmbH, Frankfurt, Germany, 65926 Frankfurt am Main                                                                                                                                                                                                                                                                                                                                                                                                                                                                           |
| Katharina | Michalik          | K.   | DSAR, Sanofi-Aventis Deutschland GmbH, Frankfurt, Germany, 65926 Frankfurt am Main                                                                                                                                                                                                                                                                                                                                                                                                                                                                                            |
| Petra     | Musholt           | P.   | Diabetes Division, Sanofi-Aventis Deutschland GmbH, Frankfurt, Germany, 65926 Frankfurt am Main                                                                                                                                                                                                                                                                                                                                                                                                                                                                               |
| Elizabeth | Ramos Lopez       | E.   | Diabetes Division, Sanofi-Aventis Deutschland GmbH, Frankfurt, Germany, 65926 Frankfurt am Main                                                                                                                                                                                                                                                                                                                                                                                                                                                                               |
| Hartmut   | Ruetten           | H.   | Diabetes Division, Sanofi-Aventis Deutschland GmbH, Frankfurt, Germany, 65926 Frankfurt am Main                                                                                                                                                                                                                                                                                                                                                                                                                                                                               |

|              |                 |      |                                                                                                                                                                                    |
|--------------|-----------------|------|------------------------------------------------------------------------------------------------------------------------------------------------------------------------------------|
| Joachim      | Tillner         | J.   | Clinical Operations, Sanofi-Aventis Deutschland GmbH, Frankfurt, Germany, 65926 Frankfurt am Main                                                                                  |
| Tania        | Baltauss        | T.   | Translational & Clinical Research, Metabolism Innovation Pole- Institut de Recherches Internationales Servier- 92284 Suresnes Cedex- FRANCE                                        |
| Oana         | Bernard Poenaru | O.   | Translational & Clinical Research, Metabolism Innovation Pole- Institut de Recherches Internationales Servier- 92284 Suresnes Cedex- FRANCE                                        |
| Nathalie     | de Preville     | N.   | Translational & Clinical Research, Metabolism Innovation Pole- Institut de Recherches Internationales Servier- 92284 Suresnes Cedex- FRANCE                                        |
| Marianne     | Rodriquez       | M.   | Biotech&Biomarkers Research Department-Institut de Recherches Internationales Servier, 78290 Croissy sur Seine - FRANCE                                                            |
| Manimozhiyan | Arumugam        | M.   | The Novo Nordisk Center for Basic Metabolic Research, Section of Metabolic Genetics, Faculty of Health and Medical Science, University of Copenhagen, Copenhagen, Denmark, DK-2100 |
| Kristine     | Allin           | K.H. | The Novo Nordisk Center for Basic Metabolic Research, Section of Metabolic Genetics, Faculty of Health and Medical Science, University of Copenhagen, Copenhagen, Denmark, DK-2100 |
| Line         | Engelbrechtsen  | L.   | The Novo Nordisk Center for Basic Metabolic Research, Section of Metabolic Genetics, Faculty of Health and Medical Science, University of Copenhagen, Copenhagen, Denmark, DK-2100 |
| Neils        | Grarup          | N.   | The Novo Nordisk Center for Basic Metabolic Research, Section of Metabolic Genetics, Faculty of Health and Medical Science, University of Copenhagen, Copenhagen, Denmark, DK-2100 |
| Torben       | Hansen          | T.   | The Novo Nordisk Center for Basic Metabolic Research, Section of Metabolic Genetics, Faculty of Health and Medical Science, University of Copenhagen, Copenhagen, Denmark, DK-2100 |
| Tue          | Hansen          | T.H. | The Novo Nordisk Center for Basic Metabolic Research, Section of Metabolic Genetics, Faculty of Health and Medical Science, University of Copenhagen, Copenhagen, Denmark, DK-2100 |
| Anna         | Jonsson         | A.   | The Novo Nordisk Center for Basic Metabolic Research, Section of Metabolic Genetics, Faculty of Health and Medical Science, University of Copenhagen, Copenhagen, Denmark, DK-2100 |
| Nikolaj      | Krarup          | N.   | The Novo Nordisk Center for Basic Metabolic Research, Section of Metabolic Genetics, Faculty of Health and Medical Science, University of Copenhagen, Copenhagen, Denmark, DK-2100 |
| Oluf         | Pedersen        | O.   | The Novo Nordisk Center for Basic Metabolic Research, Section of Metabolic Genetics, Faculty of Health and Medical Science, University of Copenhagen, Copenhagen, Denmark, DK-2100 |
| Mathilde     | Svendstrup      | M.   | The Novo Nordisk Center for Basic Metabolic Research, Section of Metabolic Genetics, Faculty of Health and Medical Science, University of Copenhagen, Copenhagen, Denmark, DK-2100 |
| Trine        | Nielsen         | T.   | The Novo Nordisk Center for Basic Metabolic Research, Section of Metabolic Genetics, Faculty of Health and Medical Science, University of Copenhagen, Copenhagen, Denmark, DK-2100 |
| Henrik       | Vestergaard     | H.   | The Novo Nordisk Center for Basic Metabolic Research, Section of Metabolic Genetics, Faculty of Health and Medical Science, University of Copenhagen, Copenhagen, Denmark, DK-2100 |
| Markku       | Laakso          | M.   | Institute of Clinical Medicine, Internal Medicine, University of Eastern Finland, 70210 Kuopio, Finland                                                                            |
| Johanna      | Kuusisto        | J.   | Institute of Clinical Medicine, Internal Medicine, University of Eastern Finland, 70210 Kuopio, Finland                                                                            |
| Paul         | Franks          | P.W. | Genetic and Molecular Epidemiology, Department of Clinical Science, Lund University, Skåne University Hospital Malmö, CRC, 91-10, 205 02, Malmö, Sweden                            |
| Leif         | Groop           | L.   | Department of Clinical Sciences, Diabetes & Endocrinology Unit, Lund University, Skåne University Hospital Malmö, CRC, 91-12, 205 02, Malmö, Sweden                                |
| Robert       | Koivula         | R.W. | Genetic and Molecular Epidemiology, Department of Clinical Science, Lund University, Skåne University Hospital Malmö, CRC, 91-10, 205 02, Malmö, Sweden                            |
| Azra         | Kurbasic        | A.   | Genetic and Molecular Epidemiology, Department of Clinical Science, Lund University, Skåne University Hospital Malmö, CRC, 91-10, 205 02, Malmö, Sweden                            |
| Martin       | Ridderstrale    | M.   | Department of Clinical Sciences, Diabetes & Endocrinology Unit, Lund University, Skåne University Hospital Malmö, CRC, 91-12, 205 02, Malmö, Sweden                                |
| Naeimeh      | Atabaki Pasdar  | N.   | Genetic and Molecular Epidemiology, Department of Clinical Science, Lund University, Skåne University Hospital Malmö, CRC, 91-10, 205 02, Malmö, Sweden                            |
| Harshal      | Deshmukh        | H.A. | Institute of Cellular Medicine, Faculty of Medical Sciences, Newcastle University, UK                                                                                              |
| Alison       | Heggie          | A.J. | Institute of Cellular Medicine, Faculty of Medical Sciences, Newcastle University, UK                                                                                              |
| Dianne       | Wake            | D.   | Diabetes Research Network, Royal Victoria Infirmary, Newcastle upon Tyne, UK                                                                                                       |
| Mark         | Walker          | M.   | Institute of Cellular Medicine, Faculty of Medical Sciences, Newcastle University, UK                                                                                              |
| Andrew       | Hattersley      | A.T. | NIHR Exeter Clinical Research Facility, University of Exeter Medical School, Exeter EX25DW                                                                                         |
| Anita        | Hill            | A.V. | NIHR Exeter Clinical Research Facility, University of Exeter Medical School, Exeter EX25DW                                                                                         |
| Angus        | Jones           | A.G. | NIHR Exeter Clinical Research Facility, University of Exeter Medical School, Exeter EX25DW                                                                                         |
| Timothy      | McDonald        | T.J. | Blood Sciences, Royal Devon and Exeter NHS Foundation Trust, Barrck Rd, Wonford, Exeter, EX2 5DW, UK                                                                               |
| Mandy        | Perry           | M.H. | Blood Sciences, Royal Devon and Exeter NHS Foundation Trust, Barrck Rd, Wonford, Exeter, EX2 5DW, UK                                                                               |

|    |            |             |      |                                                                                                                                                           |
|----|------------|-------------|------|-----------------------------------------------------------------------------------------------------------------------------------------------------------|
| 1  |            |             |      |                                                                                                                                                           |
| 2  |            |             |      |                                                                                                                                                           |
| 3  |            |             |      |                                                                                                                                                           |
| 4  |            |             |      |                                                                                                                                                           |
| 5  | Adrian     | Cudmore     | A.P. | Blood Sciences, Royal Devon and Exeter NHS Foundation Trust, Barrack Rd, Wonford, Exeter, EX2 5DW, UK                                                     |
| 6  | Andrew     | Brown       | A.A. | Department of Genetic Medicine and Development, University of Geneva Medical School, 1211 Geneva                                                          |
| 7  | Olivier    | Delaneau    | O.   | Department of Genetic Medicine and Development, University of Geneva Medical School, 1211 Geneva                                                          |
| 8  | Emmanouil  | Dermitzakis | E.T. | Department of Genetic Medicine and Development, University of Geneva Medical School, 1211 Geneva                                                          |
| 9  | Cedric     | Howald      | C.   | Department of Genetic Medicine and Development, University of Geneva Medical School, 1211 Geneva                                                          |
| 10 | Halit      | Ongen       | H.   | Department of Genetic Medicine and Development, University of Geneva Medical School, 1211 Geneva                                                          |
| 11 | Ana        | Viñuela     | A.   | Department of Genetic Medicine and Development, University of Geneva Medical School, 1211 Geneva                                                          |
| 12 | Louise     | Cabrelli    | L.   | Molecular and Clinical Medicine, Ninewells Hospital and Medical School, University of Dundee, Dundee, Scotland, United Kingdom, DD1 9SY                   |
| 13 | Helen      | Colhoun     | H.M. | formerly Dundee, recently moved to University of Edinburgh                                                                                                |
| 14 | Adem       | Dawed       | A.Y. | Molecular and Clinical Medicine, Ninewells Hospital and Medical School, University of Dundee, Dundee, Scotland, United Kingdom, DD1 9SY                   |
| 15 | Louise     | Donnelly    | L.   | Molecular and Clinical Medicine, Ninewells Hospital and Medical School, University of Dundee, Dundee, Scotland, United Kingdom, DD1 9SY                   |
| 16 | Ian        | Forgie      | I.M. | Molecular and Clinical Medicine, Ninewells Hospital and Medical School, University of Dundee, Dundee, Scotland, United Kingdom, DD1 9SY                   |
| 17 | Mike       | Loneragan   | M.   | Molecular and Clinical Medicine, Ninewells Hospital and Medical School, University of Dundee, Dundee, Scotland, United Kingdom, DD1 9SY                   |
| 18 | Ewan       | Pearson     | E.R. | Molecular and Clinical Medicine, Ninewells Hospital and Medical School, University of Dundee, Dundee, Scotland, United Kingdom, DD1 9SY                   |
| 19 | Colin      | Palmer      | C.N. | Molecular and Clinical Medicine, Ninewells Hospital and Medical School, University of Dundee, Dundee, Scotland, United Kingdom, DD1 9SY                   |
| 20 | Kaixen     | Zhou        | K.   | Molecular and Clinical Medicine, Ninewells Hospital and Medical School, University of Dundee, Dundee, Scotland, United Kingdom, DD1 9SY                   |
| 21 | Moustafa   | Abdalla     | M.   | Wellcome Trust Centre for Human Genetics, University of Oxford, Oxford, UK, OX3 7BN                                                                       |
| 22 | Juan       | Fernandez   | J.   | Wellcome Trust Centre for Human Genetics, University of Oxford, Oxford, UK, OX3 7BN                                                                       |
| 23 | Stephen    | Gough       | S.   | Oxford Centre for Diabetes Endocrinology and Metabolism, University of Oxford, Oxford, UK, OX3 7LJ                                                        |
| 24 | Chris      | Groves      | C.   | Oxford Centre for Diabetes Endocrinology and Metabolism, University of Oxford, Oxford, UK, OX3 7LJ                                                        |
| 25 | Jane       | Kaye        | J.   | Nuffield Department of Population Health, Centre for Health, Law and Emerging Technologies (HeLEX), University of Oxford, Oxford, United Kingdom, OX2 7DD |
| 26 | Anubha     | Mahajan     | A.   | Wellcome Trust Centre for Human Genetics, University of Oxford, Oxford, UK, OX3 7BN                                                                       |
| 27 | Mark       | McCarthy    | M.I. | Oxford Centre for Diabetes Endocrinology and Metabolism, University of Oxford, Oxford, UK, OX3 7LJ                                                        |
| 28 | Harriet    | Teare       | H.   | Nuffield Department of Population Health, Centre for Health, Law and Emerging Technologies (HeLEX), University of Oxford, Oxford, United Kingdom, OX2 7DD |
| 29 | Martijn    | Vandebunt   | M.   | Oxford Centre for Diabetes Endocrinology and Metabolism, University of Oxford, Oxford, UK, OX3 7LJ                                                        |
| 30 | Victoria   | Coathup     | V.   | Nuffield Department of Population Health, Centre for Health, Law and Emerging Technologies (HeLEX), University of Oxford, Oxford, United Kingdom, OX2 7DD |
| 31 | Reinhard   | Holl        | R.W. | University of Ulm, Institute for Epidemiology and medical Biometry, ZIBMT, Albert-Einstein-Allee 41, D-89081 Ulm, Germany                                 |
| 32 | Julia      | Stingl      | J.C. | Federal Institute for Drugs and Medical Devices, Research group Pharmacogenomics, Kurt-Georg-Kiesinger-Allee 3, 53175 Bonn, Germany                       |
| 33 | Jacqueline | Dekker      | J.M. | Department of Epidemiology and Biostatistics, VUMC, de Boelelaan 1089a, 1081 HV, Amsterdam, the Netherlands                                               |
| 34 | Anitra     | Koopman     | A.D. | Department of Epidemiology and Biostatistics, VUMC, de Boelelaan 1089a, 1081 HV, Amsterdam, the Netherlands                                               |
| 35 | Femke      | Rutters     | F.   | Department of Epidemiology and Biostatistics, VUMC, de Boelelaan 1089a, 1081 HV, Amsterdam, the Netherlands                                               |
| 36 | Simone     | Rauh        | S.   | Department of Epidemiology and Biostatistics, VUMC, de Boelelaan 1089a, 1081 HV, Amsterdam, the Netherlands                                               |
| 37 | Joline     | Beulens     | J.W. | Department of Epidemiology and Biostatistics, VUMC, de Boelelaan 1089a, 1081 HV, Amsterdam, the Netherlands                                               |
| 38 | Jimmy      | Bell        | J.D. | Research Centre for Optimal Health, Department of Life Sciences, University of Westminster, London UK                                                     |
| 39 | Louise     | Thomas      | E.L. | Research Centre for Optimal Health, Department of Life Sciences, University of Westminster, London UK                                                     |
| 40 |            |             |      |                                                                                                                                                           |
| 41 |            |             |      |                                                                                                                                                           |
| 42 |            |             |      |                                                                                                                                                           |
| 43 |            |             |      |                                                                                                                                                           |
| 44 |            |             |      |                                                                                                                                                           |
| 45 |            |             |      |                                                                                                                                                           |
| 46 |            |             |      |                                                                                                                                                           |
| 47 |            |             |      |                                                                                                                                                           |
| 48 |            |             |      |                                                                                                                                                           |
| 49 |            |             |      |                                                                                                                                                           |
